# Supplementary figures and images for: Free fatty acid receptor 4 deletion attenuates colitis by modulating Treg Cells via ZBED6-IL33 pathway
Source: PubMed Central journal article supplement — eBioMedicine. 2022 May 16;80:104060. doi: 10.1016/j.ebiom.2022.104060 (PMC9120243; doi:10.1016/j.ebiom.2022.104060), 2022-05-16

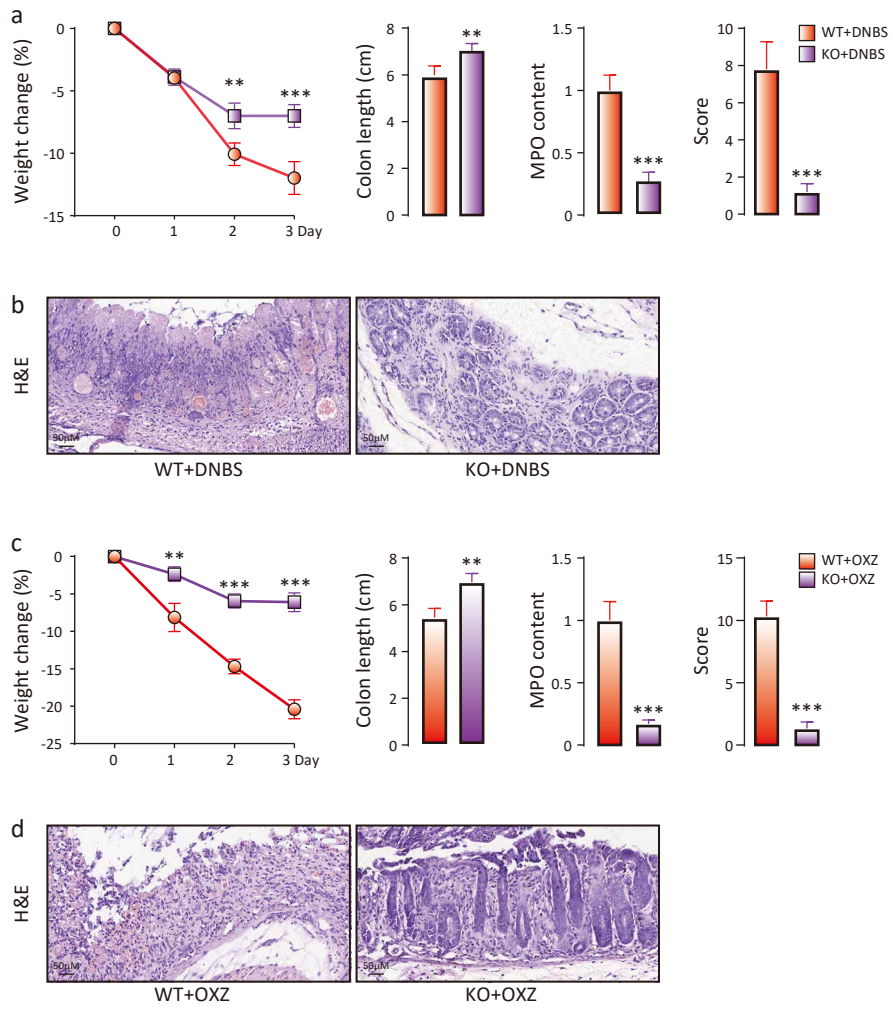

Figure S1

Supplement: mmc1.pdf [file mmc1.pdf]

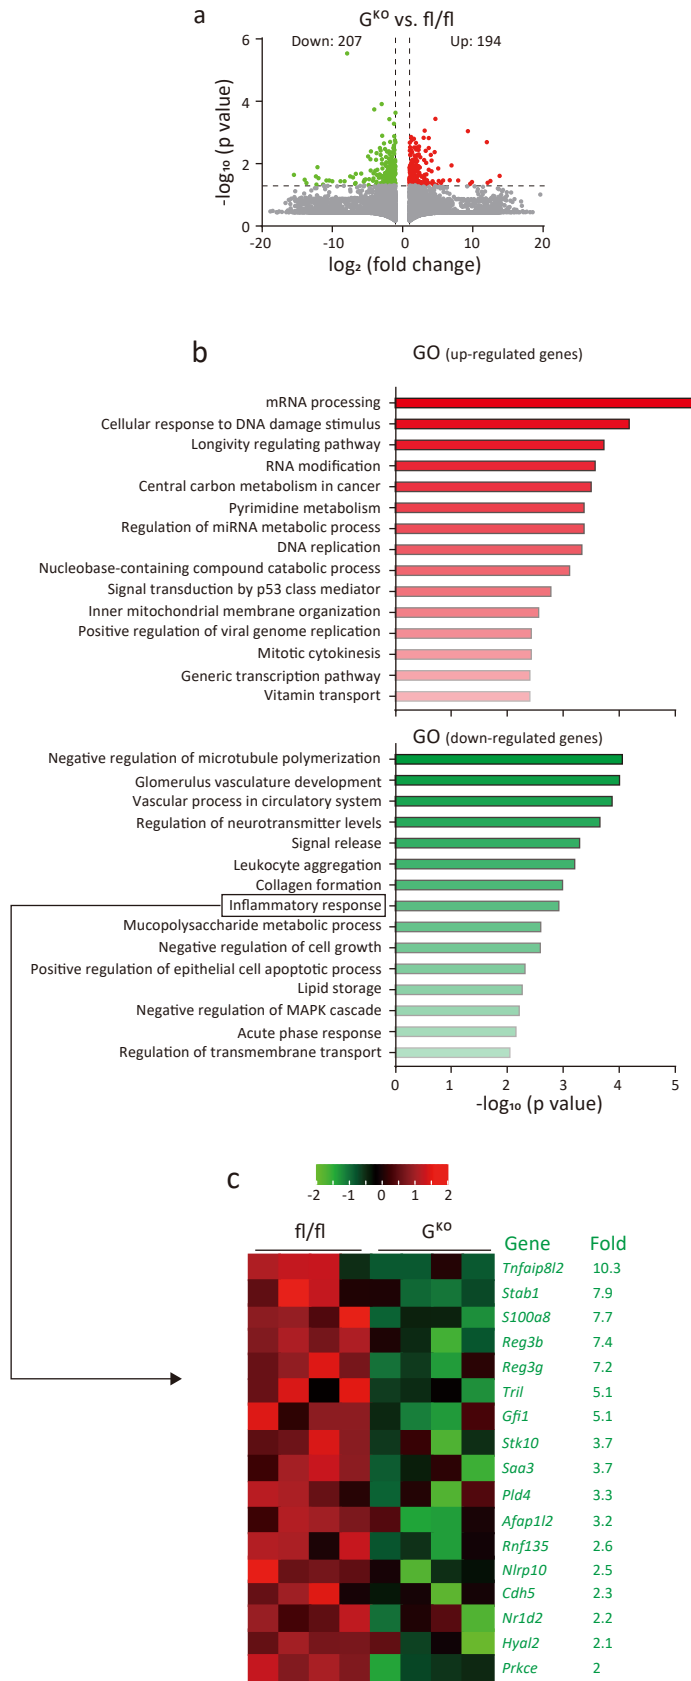

Figure S2

Supplement: mmc2.pdf [file mmc2.pdf]

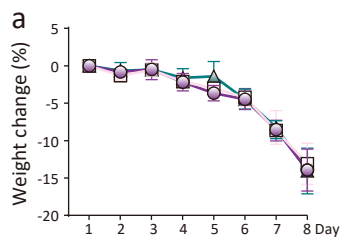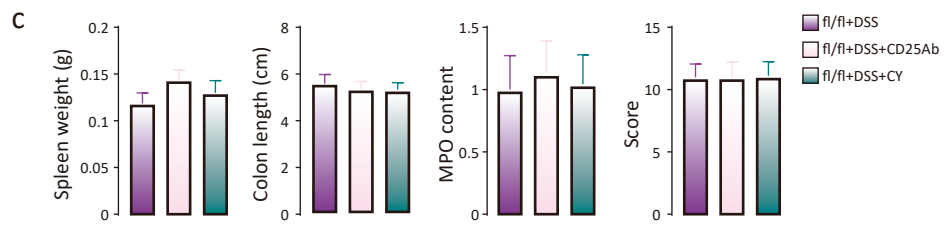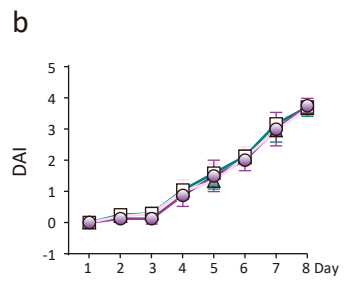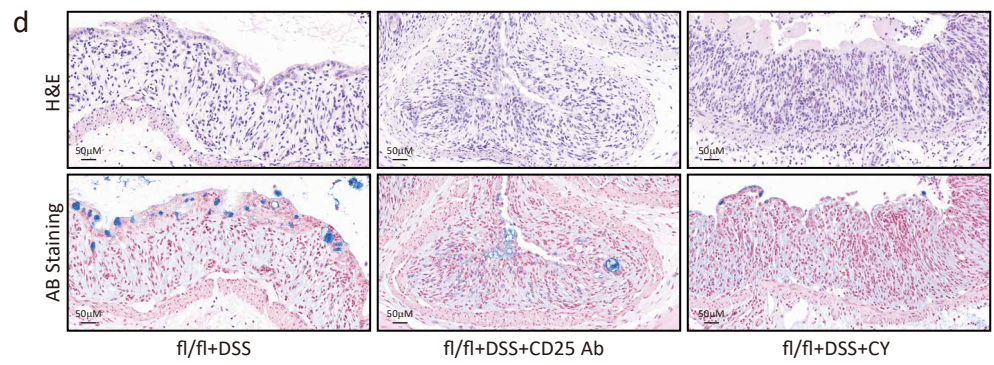

Figure S3

Supplement: mmc3.pdf [file mmc3.pdf]

# Supplemental Western blots

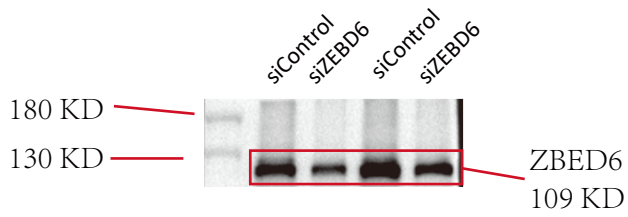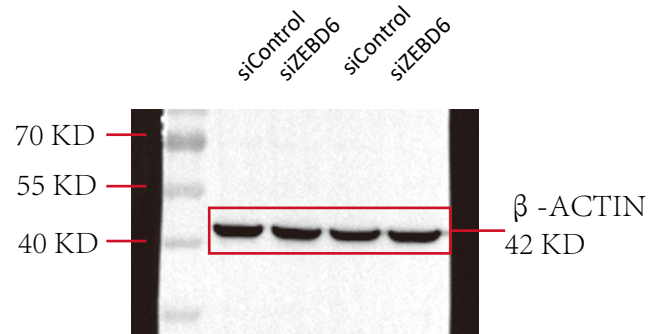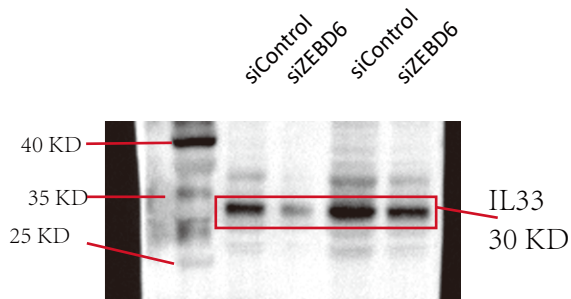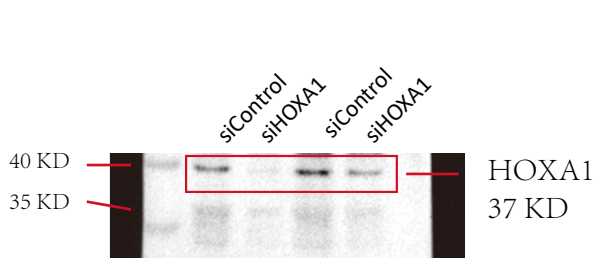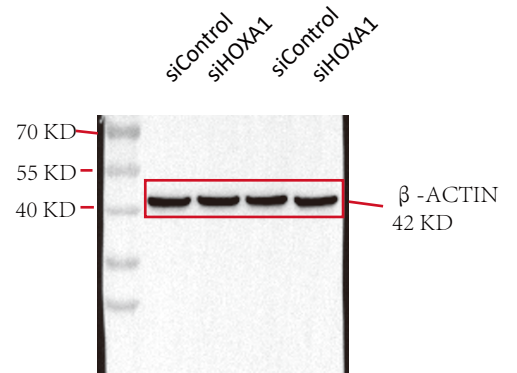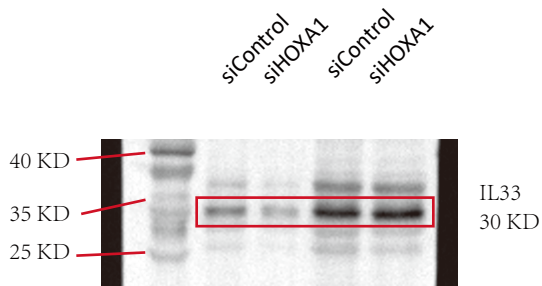

Supplement: mmc4.pdf [file mmc4.pdf]
